# Supplementary material for: Impact of multiprofessional rounds on clinical outcomes in a public ICU in Northwest Brazil
Source: Research Square preprint supplement (doi:10.21203/rs.3.rs-6180060/v1), 2025-03-17
Supplement: Supplementary file 1 [file 1f72de9e38a28cc8e2e39afb.docx]

**Table 2.** Comparison of correlations between clinical variables.

| **Category** | **Correlation coefficient (r)** | **p-value** | **Correlation strength** |
| --- | --- | --- | --- |
| Mean SAPS 3 and Patient-days Using CVC | 0,726 | < 0,001a | Strong and positive |
| Mean SAPS 3 and CVC Utilization Rate | 0,731 | < 0,001a | Strong and positive |
| Mean SAPS 3 and Patient-days Using IUC | 0,667 | < 0,001b | Moderate and positive |
| Mean SAPS 3 and IUC Utilization Rate | 0,599 | 0,002b | Moderate and positive |

ᵃPearson’s correlation test; ᵇSpearman’s correlation test; SAPS 3 - Simplified Acute Physiology Score 3; CVC - Central Venous Catheter; IUC - Indwelling Urinary Catheter.
