# Supplementary material for: Impact of multiprofessional rounds on clinical outcomes in a public ICU in Northwest Brazil
Source: Research Square preprint supplement (doi:10.21203/rs.3.rs-6180060/v1), 2025-03-17
Supplement: Supplementary file 2 [file f9b7133859470e8a3a09053a.docx]

**Table 1.** Comparison of clinical variables between the groups one year before and one year after the implementation of daily multiprofessional rounds.

| **Category** | **Pre-rounds (n = 12)** | **Post-rounds (n = 12)** | **p-value** |
| --- | --- | --- | --- |
| Monthly admissions | 26,67 ± 7,75 | 27,67 ± 5,05 | 0,712a |
| Patients-days | 233 [211-248] | 240 [233-244] | 0,514b |
| ICU occupancy rate (%) | 96,50 [88,2-102] | 100 [95,5-102] | 0,551b |
| Mean age | 46,7 [44,2-48,7] | 47,9 [42,7-56,1] | 0,590b |
| ICU length of stay (days) | 13,24 ± 4,83 | 12,71 ± 4,17 | 0,779a |
| Monthly medical admissions | 10 ± 4,57 | 10,1 ± 4,4 | 0,928a |
| Monthly surgical admissions | 10 ± 2,69 | 10 ± 3,60 | 0,949a |
| Mean SAPS 3 | 39,40 ± 4,88 | 60,63 ± 7,45 | < 0,001a |
| Predicted mortality rate (%) | 10,5 [5,5-15,7] | 41,5 [27-47] | < 0,001b |
| Mortality Rate (%) | 37,0 [30,5-53,2] | 35,5 [21,2-42,0] | 0,266b |
| Standardized Mortality Ratio | 3,6 [2,4-6,0] | 0,7 [0,5-1,4] | < 0,001b |
| Patient-days using CVC | 101,5 ± 55,63 | 161,33 ± 31,90 | 0,004a |
| CVC utilization rate (%) | 42,92 ± 21,48 | 67,50 ± 12,51 | 0,002a |
| Patient-days using IUC | 171 [109-211] | 210 [181-220] | 0,033b |
| IUC utilization rate (%) | 71,5 [52,7-88,2] | 88,0 [77,5-91,5] | 0,060b |
| Patient-days using IMV | 140 [85-163] | 155 [132-166] | 0,219b |
| IMV utilization rate (%) | 55,08 ± 13,98 | 63,42 ± 10,63 | 0,115a |
| IMV Duration (days) | 9,5 [8-10] | 7 [6-8] | 0,017b |

ᵃStudent’s t-test for independent samples; ᵇMann-Whitney U test; SAPS 3 - Simplified Acute Physiology Score 3; CVC - Central Venous Catheter; IMV - Invasive Mechanical Ventilation; IUC - Indwelling Urinary Catheter.
